# Supplementary material for: Evaluating the impact of a community-based cancer awareness roadshow on awareness, attitudes and behaviors
Source: PubMed Central journal article supplement (PMC4893017; doi:10.1016/j.ypmed.2016.02.034), 2016-06
Supplement: mmc1.pdf [file mmc1.pdf]

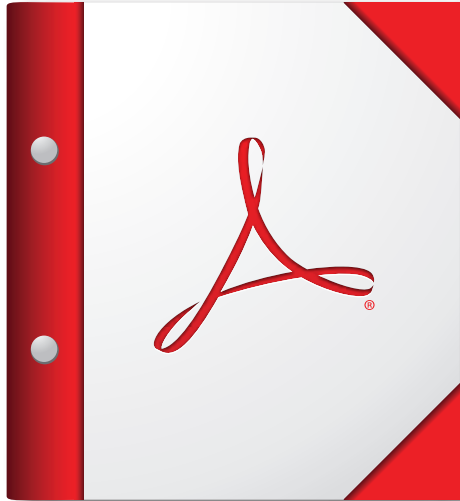

**For the best experience, open this PDF portfolio in  
Acrobat 9 or Adobe Reader 9, or later.**

[Get Adobe Reader Now!](#)
